# Supplementary material for: Bacterial and fungal chitinase chiJ orthologs evolve under different selective constraints following horizontal gene transfer
Source: PubMed Central journal article supplement (PMC3506478; doi:10.1186/1756-0500-5-581), 2012-10-24
Supplement: 1756-0500-5-581-S1.pdf [file 1756-0500-5-581-S1.pdf]

Additional file 1. Protein structures used for structural alignment.

Listed structures were aligned and superimposed to understand the domain boundaries, substrate binding and catalysis of ChiJ.

| Structure          | Species                                           | PDB entry          |
|--------------------|---------------------------------------------------|--------------------|
| Chitinase B (ChiB) | <i>Serratia marcescens</i>                        | 1E6N <sup>1</sup>  |
| Chitinase B (ChiB) | <i>Serratia marcescens</i>                        | 1H0G <sup>2</sup>  |
| Chitinase B (ChiB) | <i>Serratia marcescens</i>                        | 1O6I <sup>3</sup>  |
| Lectin (Ym1)       | <i>Mus musculus</i>                               | 1E9L <sup>4</sup>  |
| Chitinase A (ChiA) | <i>Serratia marcescens</i>                        | 1FFR <sup>5</sup>  |
| Hevamine           | <i>Hevea brasiliensis</i>                         | 1HVQ <sup>6</sup>  |
| Hevamine           | <i>Hevea brasiliensis</i>                         | 1KQY <sup>7</sup>  |
| Hevamine           | <i>Hevea brasiliensis</i>                         | 1KQZ <sup>7</sup>  |
| Hevamine           | <i>Hevea brasiliensis</i>                         | 1KR1 <sup>7</sup>  |
| Chitinase A1       | <i>Bacillus circulans</i>                         | 1ITX <sup>8</sup>  |
| Chitinase          | <i>Aspergillus fumigatus</i>                      | 1W9P <sup>9</sup>  |
| Haementhin         | <i>Scadoxus multiflorus</i>                       | 3D5H <sup>10</sup> |
| Chitinase A (ChiA) | <i>Streptomyces coelicolor</i>                    | 3EBV <sup>10</sup> |
| Chitinase          | <i>Lactococcus lactis</i> subsp.<br><i>Lactis</i> | 3IAN <sup>10</sup> |

<sup>1</sup>van Aalten DM, Komander D, Synstad B, Gåseidnes S, Peter MG, Eijsink VG: **Structural insights into the catalytic mechanism of a family 18 exo-chitinase.** *Proc Natl Acad Sci USA* 2001, **98**:8979-8984.

<sup>2</sup>Houston DR, Shiomi K, Arai N, Omura S, Peter MG, Turberg A, Synstad B, Eijsink VG, van Aalten DM: **High-resolution structures of a chitinase complexed with natural product cyclopentapeptide inhibitors: mimicry of carbohydrate substrate.** *Proc Natl Acad Sci USA* 2002, **99**:9127-9132.

<sup>3</sup>Houston DR, Eggleston I, Synstad B, Eijsink VG, van Aalten DM: **The cyclic dipeptide CI-4 [cyclo-(l-Arg-d-Pro)] inhibits family 18 chitinases by structural mimicry of a reaction intermediate.** *Biochem J* 2002, **368**:23-27.

<sup>4</sup>Sun YJ, Chang NC, Hung SI, Chang AC, Chou CC, Hsiao CD: **The crystal structure of a novel mammalian lectin, Ym1, suggests a saccharide binding site.** *J Biol Chem* 2001, **276**:17507-17514.

<sup>5</sup>Papanikolau Y, Prag G, Tavlas G, Vorgias CE, Oppenheim AB, Petratos K: **High resolution structural analyses of mutant chitinase A complexes with substrates provide new insight into the mechanism of catalysis.** *Biochemistry* 2001, **40**:11338-11343.

<sup>6</sup>Terwisscha van Scheltinga AC, Kalk KH, Beintema JJ, Dijkstra BW: **Crystal structures of hevamine, a plant defence protein with chitinase and lysozyme activity, and its complex with an inhibitor.** *Structure* 1994, **2**:1181-1189.

<sup>7</sup>Bokma E, Rozeboom HJ, Sibbald M, Dijkstra BW, Beintema JJ: **Expression and characterization of active site mutants of hevamine, a chitinase from the rubber tree *Hevea brasiliensis*.** *Eur J Biochem* 2002, **269**:893-901.

<sup>8</sup>Matsumoto T, Nonaka T, Hashimoto M, Watanabe T, Mitsui Y: **Three-dimensional structure of the catalytic domain of chitinase A1 from *Bacillus circulans* WL-12 at a very high resolution.** *Proc Jpn Acad Ser B* 1999, **75**:269-274.

<sup>9</sup>Rao FV, Houston DR, Boot RG, Aerts JM, Hodkinson M, Adams DJ, Shiomi K, Omura S, van Aalten DM: **Specificity and affinity of natural product cyclopentapeptide inhibitors against *A. fumigatus*, human, and bacterial chitinases.** *Chem Biol* 2005, **12**:65-76.

<sup>10</sup>Unpublished.
