# Supplementary material for: Bacterial and fungal chitinase chiJ orthologs evolve under different selective constraints following horizontal gene transfer
Source: PubMed Central journal article supplement (PMC3506478; doi:10.1186/1756-0500-5-581), 2012-10-24
Supplement: 1756-0500-5-581-S2.pdf [file 1756-0500-5-581-S2.pdf]

Additional file 2. Alignment of *Streptomyces* spp. ChiJ sequences, where a dot indicate an identical amino acid residue as in *S. clavuligerus* ChiJ and a dash indicate a gap.

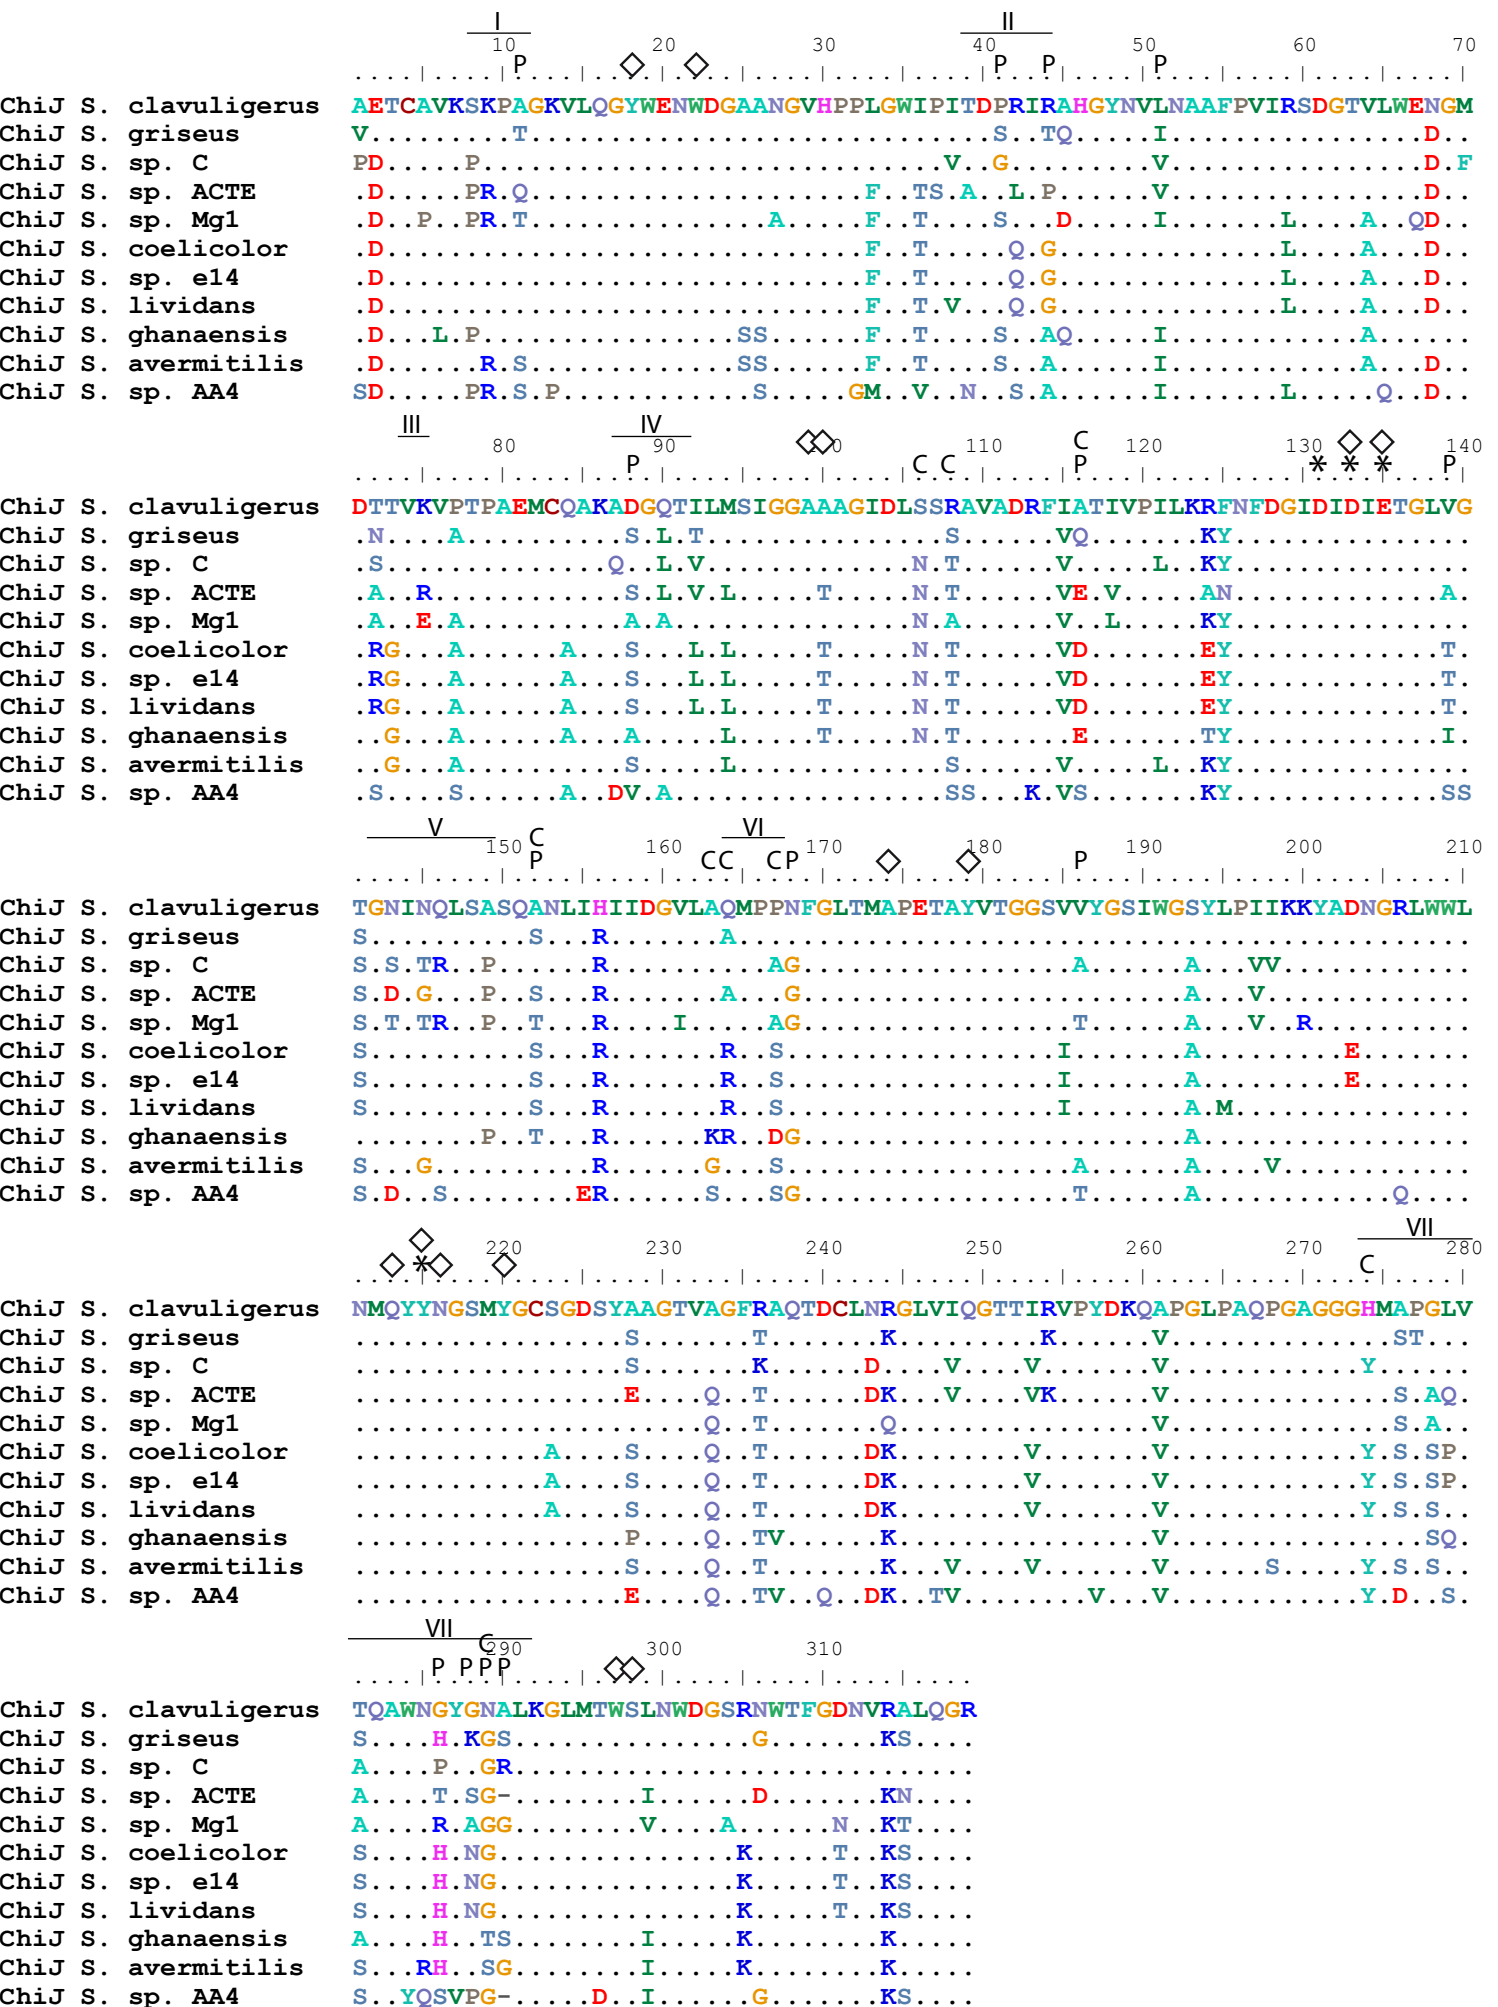

As outlined in Fig. 3, asterisks (\*) indicate positions of predicted catalytic residues, diamonds (◇) indicate predicted substrate-interacting residues, P indicate residues under positive selection, C indicate co-evolving residues. Positions of highly variable regions are indicated (I through VII).
