# Supplementary material for: Bacterial and fungal chitinase chiJ orthologs evolve under different selective constraints following horizontal gene transfer
Source: PubMed Central journal article supplement (PMC3506478; doi:10.1186/1756-0500-5-581), 2012-10-24
Supplement: 1756-0500-5-581-S3.pdf [file 1756-0500-5-581-S3.pdf]

Additional file 3. Predicted catalytic and substrate binding residues in ChiJ.

Comparison of residues of *Streptomyces* ChiJ model (STRP) corresponding to catalysis (red) and substrate binding (black) in *Serratia marcescens* chitinase A structure [PDB:1FFR] and hevamine [PDB:1HVQ].

|                            | 1FFR   | 1HVQ | STRP |      |
|----------------------------|--------|------|------|------|
| Active site                | D313   | D125 | D169 |      |
|                            | E315   | E127 | E171 |      |
|                            | F/Y390 | Y183 | Y251 |      |
|                            | D311   | D123 | D167 |      |
| Substrate binding subsites |        |      |      |      |
|                            | -5     | Y170 | -    | -    |
|                            | -4     | R172 | -    | -    |
|                            | -3     | W167 | -    | W58  |
|                            |        | T276 | I82  | A136 |
|                            |        | E473 | -    | -    |
|                            | -2     | W275 | G81  | A135 |
|                            |        | T276 | I82  | A136 |
|                            |        | E473 | -    | -    |
|                            |        | W539 | W255 | W333 |
|                            |        | E540 | S256 | S334 |
|                            | -1     | Y163 | Y6   | Y54  |
|                            |        | W275 | G81  | A135 |
|                            |        | D313 | D125 | D169 |
|                            |        | E315 | E127 | E171 |
|                            |        | A362 | A156 | A210 |
|                            |        | M388 | Q181 | Q249 |
| F/Y390                     |        | Y183 | Y251 |      |
| D391                       |        | N184 | N252 |      |
| Y444                       |        | -    | -    |      |
| R446                       |        | -    | -    |      |
| W539                       | W255   | W333 |      |      |
| +1                         | W275   | G81  | A135 |      |
|                            | E315   | E127 | E171 |      |
|                            | F316   | -    | -    |      |
|                            | M388   | Q181 | Q249 |      |
|                            | D391   | N184 | N252 |      |
|                            | R446   | -    | -    |      |
| +2                         | W275   | G81  | A135 |      |
|                            | K369   | -    | Y215 |      |
|                            | D391   | N184 | N252 |      |
|                            | F396   | -    | -    |      |
|                            | Y418   | -    | Y256 |      |
